# Supplementary material for: Robot-Assisted Arm Training versus Therapist-Mediated Training after Stroke: A Systematic Review and Meta-Analysis
Source: J Healthc Eng. 2020 Oct 27;2020:8810867. doi: 10.1155/2020/8810867 (PMC7641296; doi:10.1155/2020/8810867)
Supplement: Supplementary Materials — Appendix 1: preferred reporting items for systematic reviews and meta-analyses (PRISMA) statement. Appendix 2: this file describes the following. I: Forest plots for the outcome measures. II: Metaregression of participant characteristics, training time, and publication year for the outcome measures. III: Funnel plot of standard error for the outcome measures. IV: Supplementary Table 1: PubMed search strategy. V: Supplementary Table 2: Included study characteristics. VI: References of the included studies. [file 8810867.f1.zip]

Archive with 2 entries (2 files):
- 8810867.f1/PRISMA 2009 checklist FILLED (1).doc
- 8810867.f1/SUPPLEMENTAL MATERIAL (2).docx
